# Supplementary material for: Spinal muscular atrophy genetic epidemiology and the case for premarital genomic screening in Arab populations
Source: PubMed Central journal article supplement (PMC11180197; doi:10.1038/s43856-024-00548-1), 2024-06-15
Supplement: 43856_2024_548_MOESM2_ESM.pdf [file 43856_2024_548_MOESM2_ESM.pdf]

## Description of Additional Supplementary Files

**File name:** Supplementary Data 1

**File Description:** Source data file.
